# Supplementary material for: IFNγ inhibits Th17 differentiation and function via Tbet-dependent and Tbet-independent mechanisms
Source: PubMed Central journal article supplement — J Neuroimmunol. Author manuscript; Available in PMC 2015 Mar 18. (PMC4363997; doi:10.1016/j.jneuroim.2013.12.001), 2013-12-12
Supplement: NIHMS661118-supplement.pdf [file NIHMS661118-supplement.pdf]

## **SUPPLEMENTAL FIGURE LEGENDS**

**Supplemental Figure 1. Tbet intrinsically suppresses IL-17A production in CD4 T cells during EAE.** (A and B) Lymphocytes were isolated from the brain (BR) and spinal cord (SC) of mixed bone marrow chimeric mice (WT/WT and WT/Tbet<sup>-/-</sup>) at the peak EAE. IFN $\gamma$  and IL-17A production by CD45.2<sup>+</sup> CD4 T cells was analyzed by intracellular staining and FACS after a 4-hr PMA/ionomycin (P/I) stimulation. Representative plots are gated on CD45.2<sup>+</sup>CD4<sup>+</sup> cells. Cumulative data of the frequencies of IFN $\gamma$  and IL-17A producing CD45.2<sup>+</sup> CD4 T cells in the CNS from two independent experiments are shown ( $n = 8-9$ ). (C) Intact WT and Tbet<sup>-/-</sup> mice were immunized for EAE and lymphocytes analyzed at the peak of disease. Intracellular cytokine staining was performed after a 4-hr P/I stimulation. Representative plots are gated on CD4<sup>+</sup> cells. Collective data from two independent experiments are shown in the graphs to the right ( $n = 9-12$ ).

**Supplemental Figure 2. SFB levels do not correlate with the susceptibility of WT and Tbet<sup>-/-</sup> mice to EAE.** EAE was induced in WT and Tbet<sup>-/-</sup> mice obtained directly from Taconic Farms, Inc. or The Jackson Laboratory. At the peak of disease, fecal pellets were collected from WT and Tbet<sup>-/-</sup> mice. DNA was extracted from the pellets and the levels of SFB were identified by PCR of SFB16S rDNA.

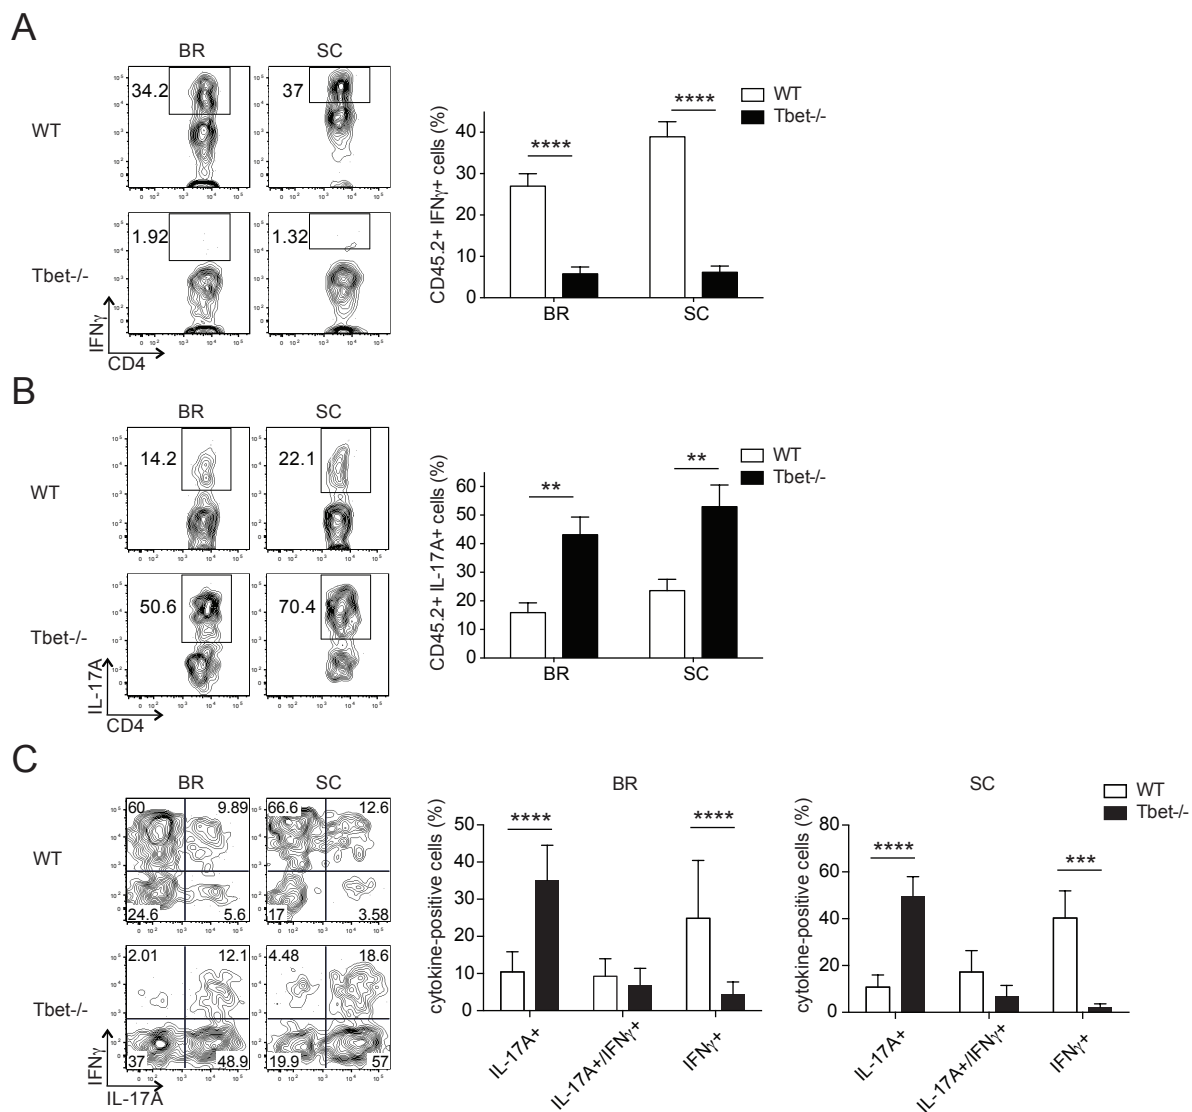

Supplemental Figure 1

Taconic

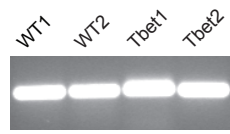

Jackson

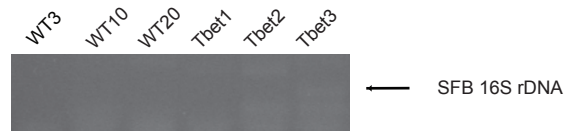

Supplemental Figure 2
